# Supplementary material for: Smart soaps: stimulus responsive soap–hydrogel bead composites for controlled dissolution and release of actives
Source: Royal Society of Chemistry journal article supplement (doi:10.1039/c7qm00556c), 2018-01-01
Supplement: c7qm00556c1.pdf [file c7qm00556c1.pdf]

## ***Electronic Supporting Information***

### **Smart soaps: Stimulus responsive soap-hydrogel bead composites for controlled dissolution and release of actives”**

**Benjamin R. Thompson,<sup>a</sup> Marius Rutkevicius,<sup>a</sup> Tommy S. Horozov,<sup>a</sup> Simeon D. Stoyanov<sup>b,c,d</sup>  
and Vesselin N. Paunov\*,<sup>a</sup>**

<sup>a</sup> *School of Mathematics and Physical Sciences (Chemistry), University of Hull, Hull, United Kingdom., Tel: +44 (0)1482 465660; Fax: +441482466410, \*E-mail for correspondence: [v.n.paunov@hull.ac.uk](mailto:v.n.paunov@hull.ac.uk);*

<sup>b</sup> *Unilever R&D Vlaardingen, Olivier van Noortlaan 120, 3133 AT Vlaardingen, the Netherlands;*

<sup>c</sup> *Laboratory of Physical Chemistry and Soft Matter, Wageningen University, 6703 HB Wageningen, The Netherlands.*

<sup>d</sup> *Department of Mechanical Engineering, University College London, Torrington Place, London WC1E 7JE, UK.*

*(Materials Chemistry Frontiers, 2018, DOI: 10.1039/c7qm00556c)*

Description of the enclosed video supplementary materials:

**Video S1.** Materials for preparation of soap-hydrogel bead composites

**Video S2.** Formulation of soap-hydrogel bead composites

**Video S3.** Behaviour of soap-hydrogel bead composites under compression

**Video S4.** Release of active components encapsulated in soap-hydrogel bead composites

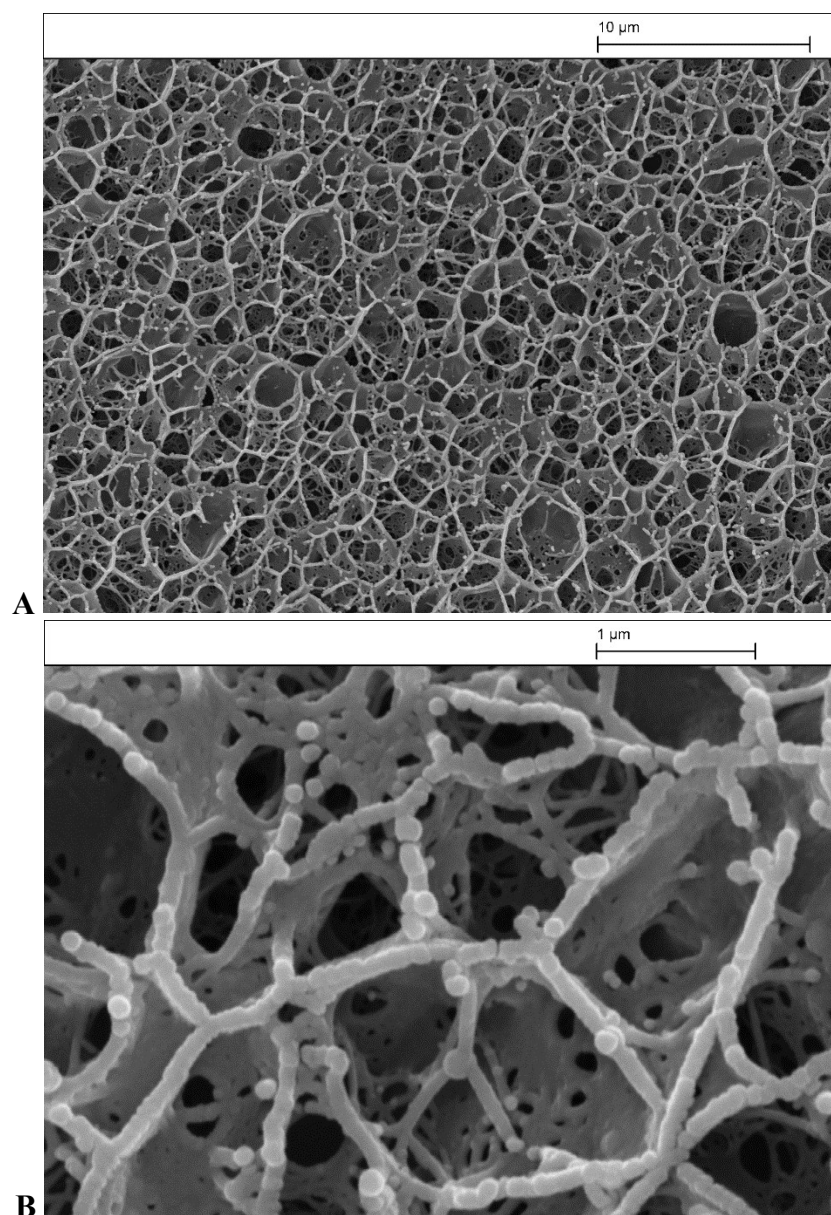

**Figure S1.** SEM images of a flash-frozen and freeze-dried agar (2.0% w/v) hydrogel sample. The sample were imaged after it was flash-frozen in slush nitrogen, fractured by a blade and then the water content sublimed at -70 °C for 7 minutes. (A) and (B) correspond to different magnifications.

The microstructure of agar hydrogel is known to be largely independent of the agar concentration. We did not observe any difference between 1.0% w/v and 2.0% w/v agar hydrogel morphology upon freeze-dying.

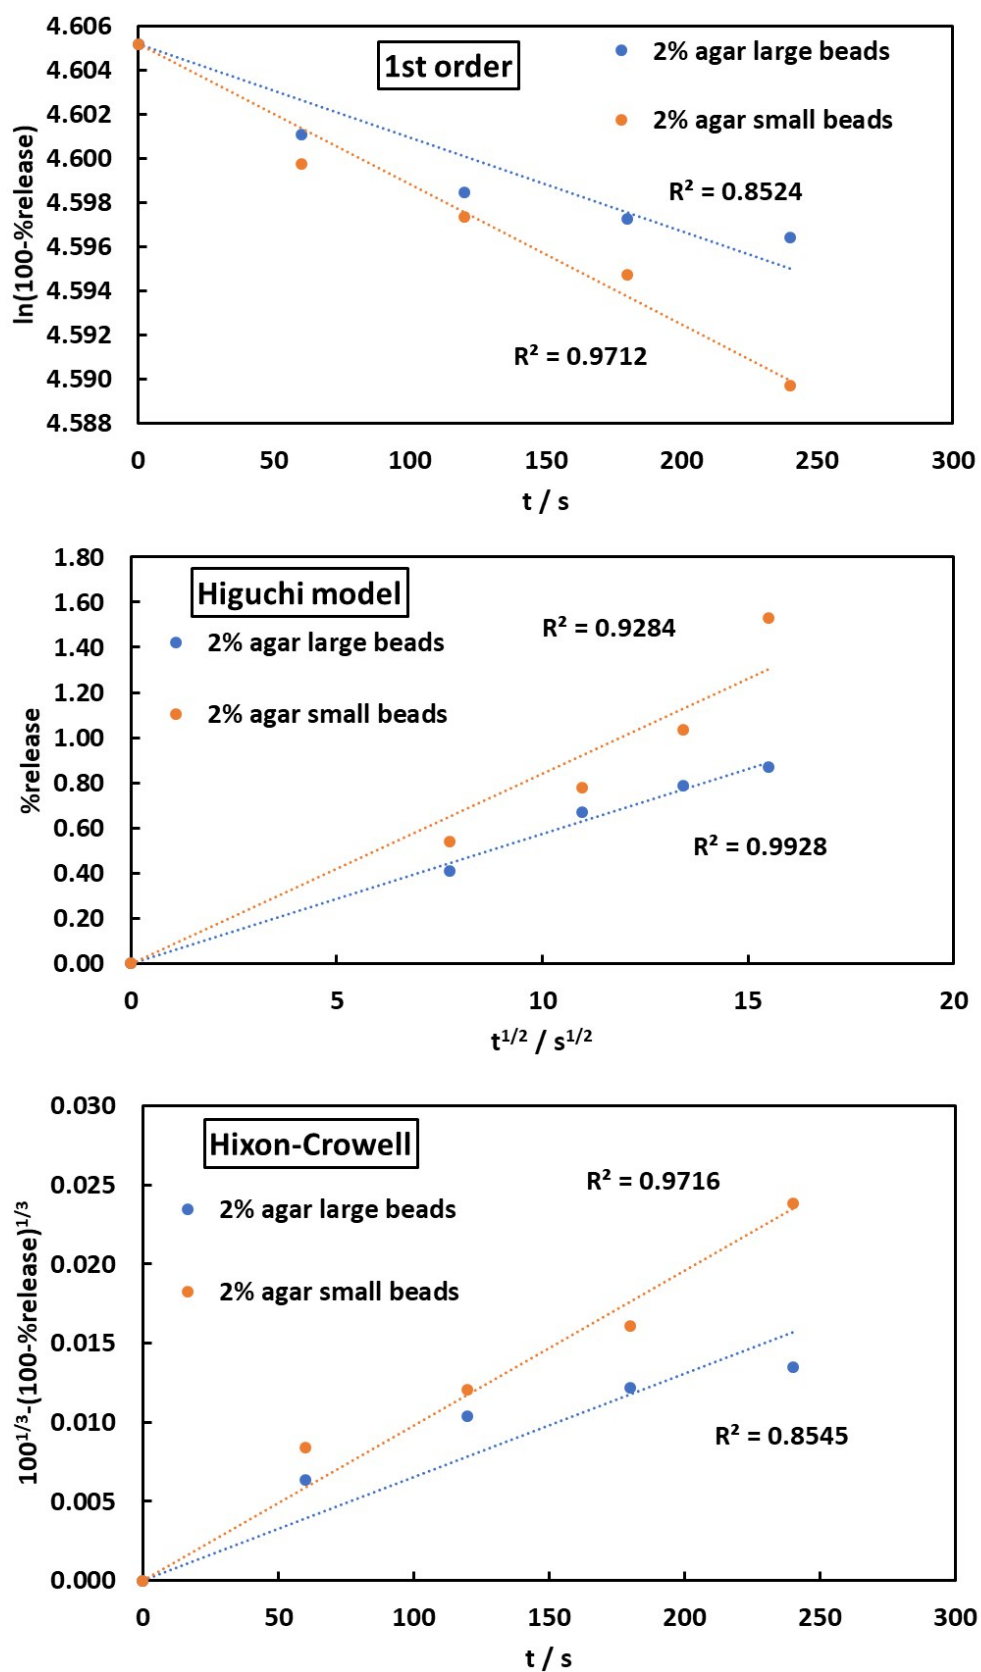

Figure S2. Fitting of the experimental data for berberine release from 50:50 soap:agar hydrogel beads composites at 2% agar concentration in the hydrogel.

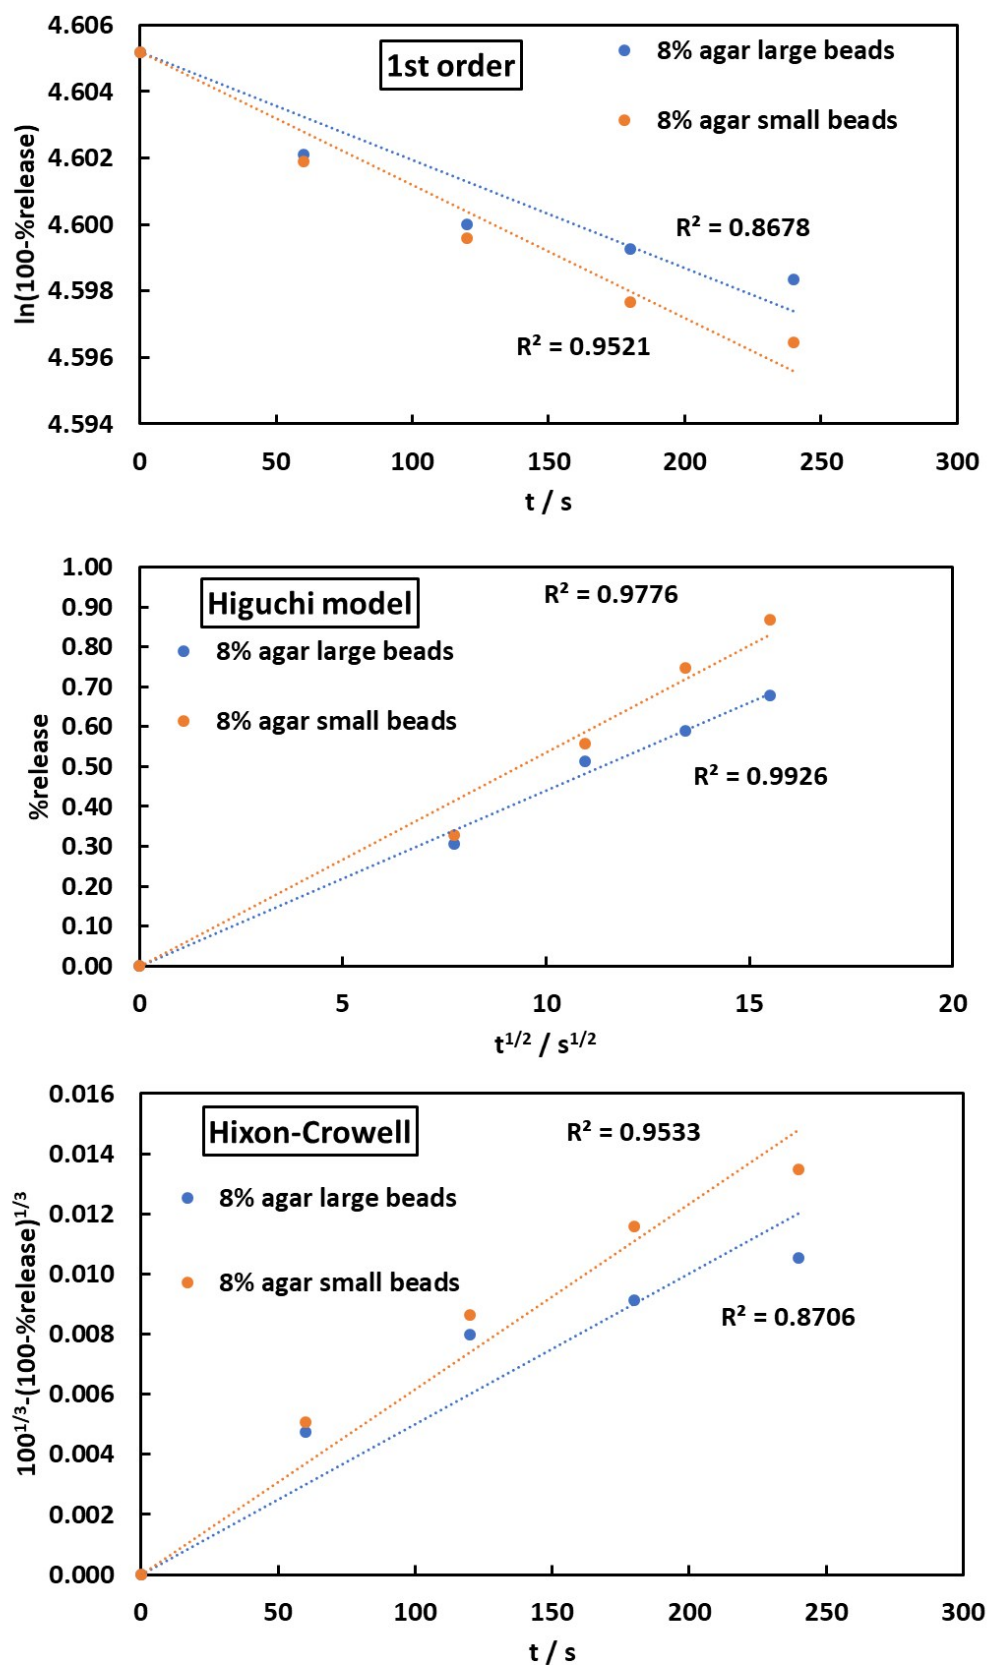

Figure S3. Fitting of the experimental data for berberine release from 50:50 soap:agar hydrogel beads composites at 8% agar concentration in the hydrogel.

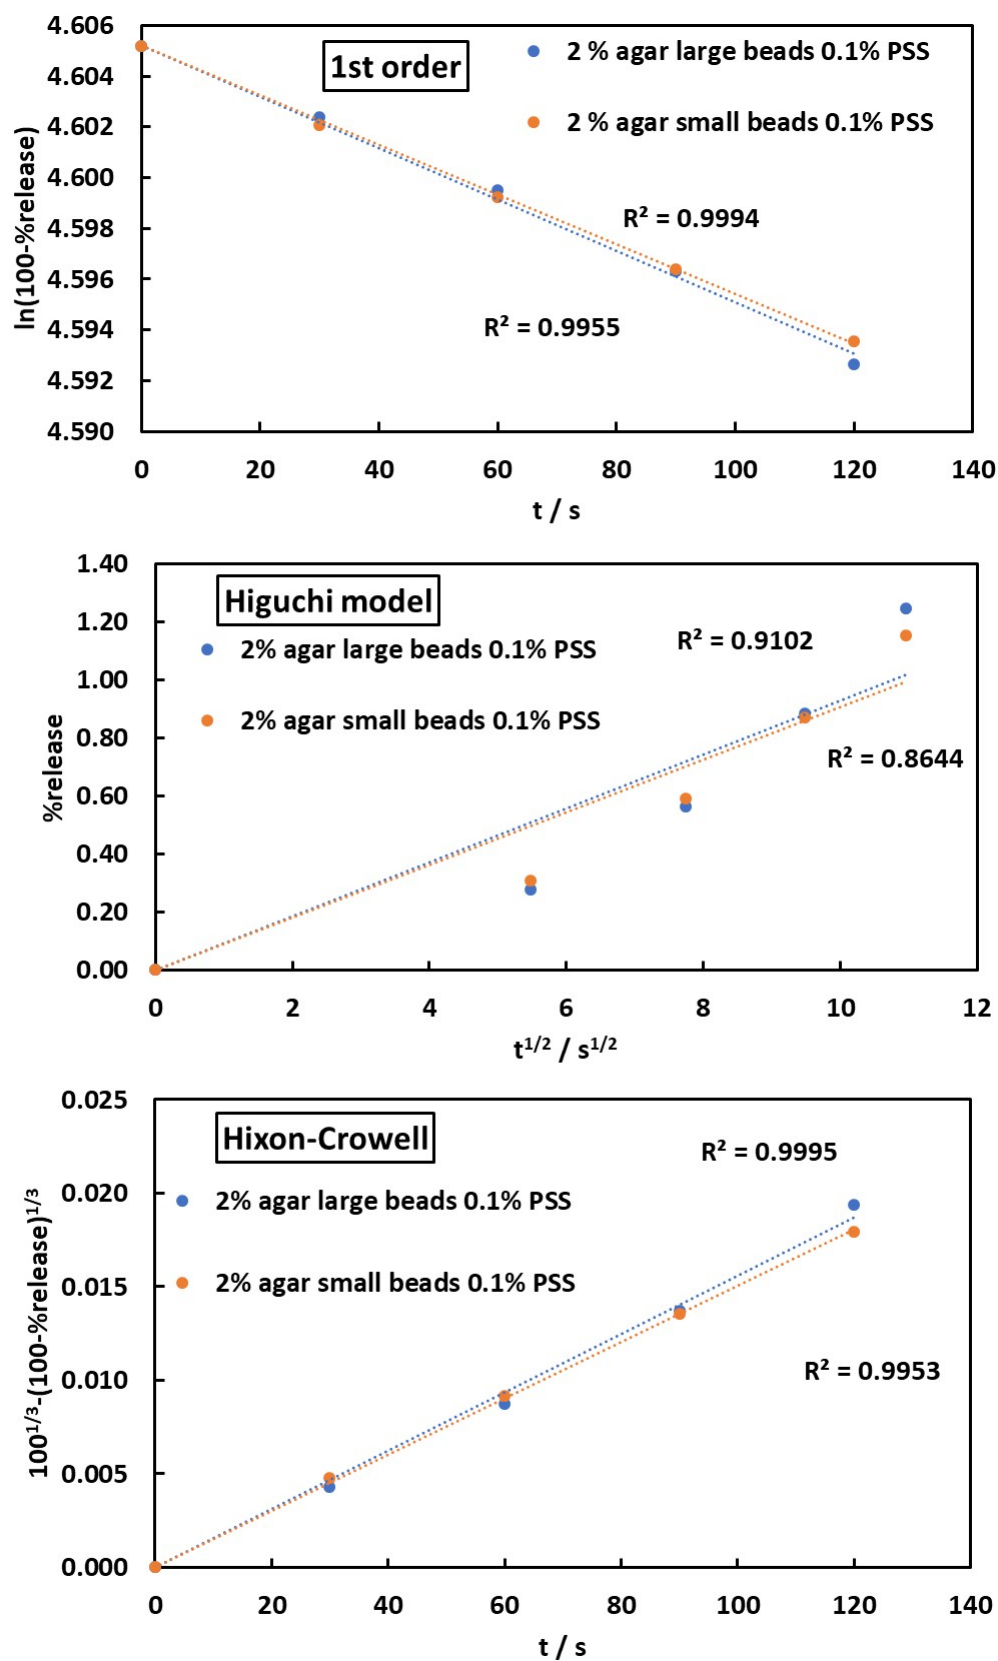

Figure S4. Fitting of the experimental data for berberine release from 50:50 soap:agar hydrogel beads composites at 2% agar concentration in the hydrogel and 0.1% PSS.

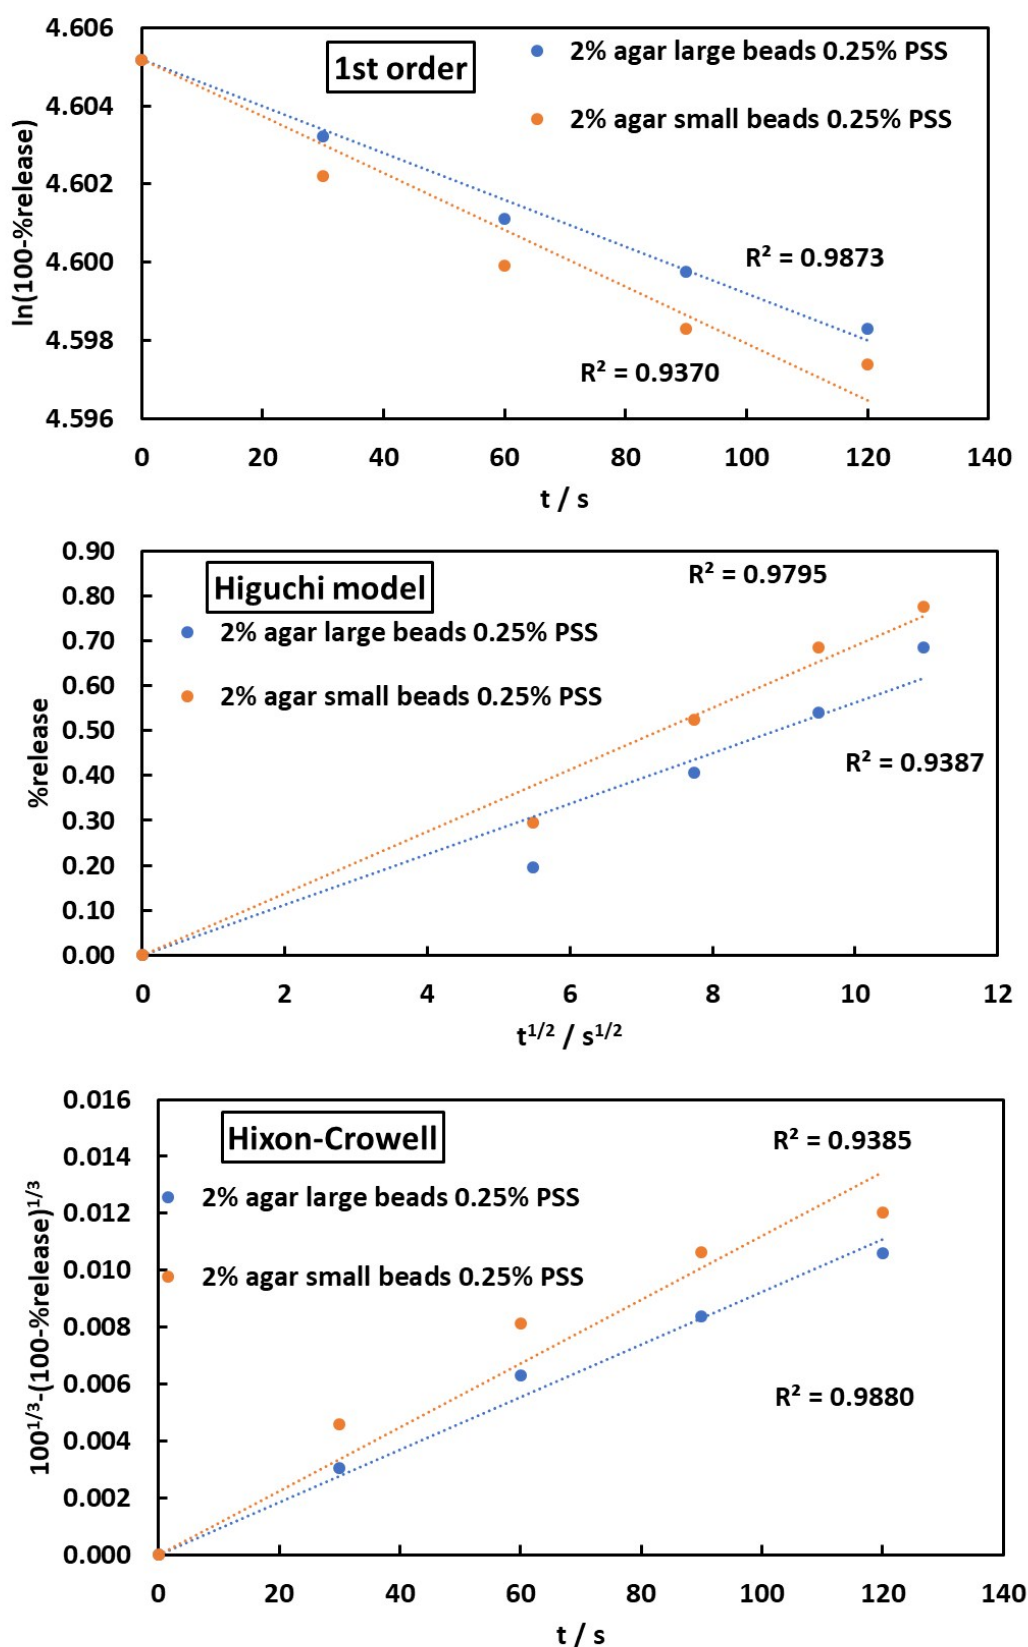

Figure S5. Fitting of the experimental data for berberine release from 50:50 soap:agar hydrogel beads composites at 2% agar concentration in the hydrogel and 0.25% PSS.
